# Supplementary material for: Notfallsonographiekonzepte im nichttraumatologischen Schockraum – eFAST, FEEL, RUSH und andere
Source: Springer Nature journal article supplement (doi:10.1007/s10049-023-01197-y), 2023-09-18
Supplement: MOESM2 [file 10049_2023_1197_MOESM2_ESM.pdf]

## Notfallsonographiekonzepte im nichttraumatologischen Schockraum –eFAST, FEEL, RUSH und andere

Stefanie Bentele, Henning Biermann, Armin Seibel, Beatrice Fundel, Katja Mutter, Ingmar Gröning

### Angaben zur Veröffentlichung / Publication details:

Bentele, Stefanie, Henning Biermann, Armin Seibel, Beatrice Fundel, Katja Mutter, and Ingmar Gröning. 2023. "Notfallsonographiekonzepte im nichttraumatologischen Schockraum –eFAST, FEEL, RUSH und andere." *Notfall + Rettungsmedizin* 26 (7): 517–26. <https://doi.org/10.1007/s10049-023-01197-y>.

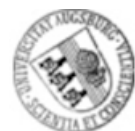

# Durchführung des RUSH-Protokolls nach ACiLS

## Supplement 2

### Notfallsonographiekonzepte – eFAST, FEEL, RUSH und andere

**Stefanie Bentele<sup>1</sup>, Henning Biermann<sup>2</sup>, Armin Seibel<sup>3</sup>, Beatrice Fundel<sup>4</sup>, Katja Mutter<sup>5</sup>, Ingmar Gröning<sup>4</sup>**

<sup>1</sup>Zentrale Notaufnahme und IV. Medizinische Klinik, Universitätsklinikum Augsburg, Augsburg, Deutschland

<sup>2</sup>Zentrum für Klinische Akut- und Notfallmedizin, Uniklinik RWTH Aachen, Aachen, Deutschland

<sup>3</sup>Zentrum für Interdisziplinäre Intensivmedizin, DRK Krankenhaus Kirchen, Kirchen, Deutschland

<sup>4</sup>Klinik für Notfallmedizin, Krankenhaus Maria-Hilf, Krefeld, Deutschland

<sup>5</sup>Zentrale Notaufnahme, Klinik am Eichert, Alb-Fils-Kliniken Göppingen, Göppingen, Deutschland

Bildmaterial: Mit freundlicher Genehmigung ©B.Fundel, N.Schmidt, I.Gröning und ACiLS, DGINA alle Rechte vorbehalten.

4  
Heart

2  
Pulmo

Aorta

$I_{(vc)}$  mix

FAST 6  
with

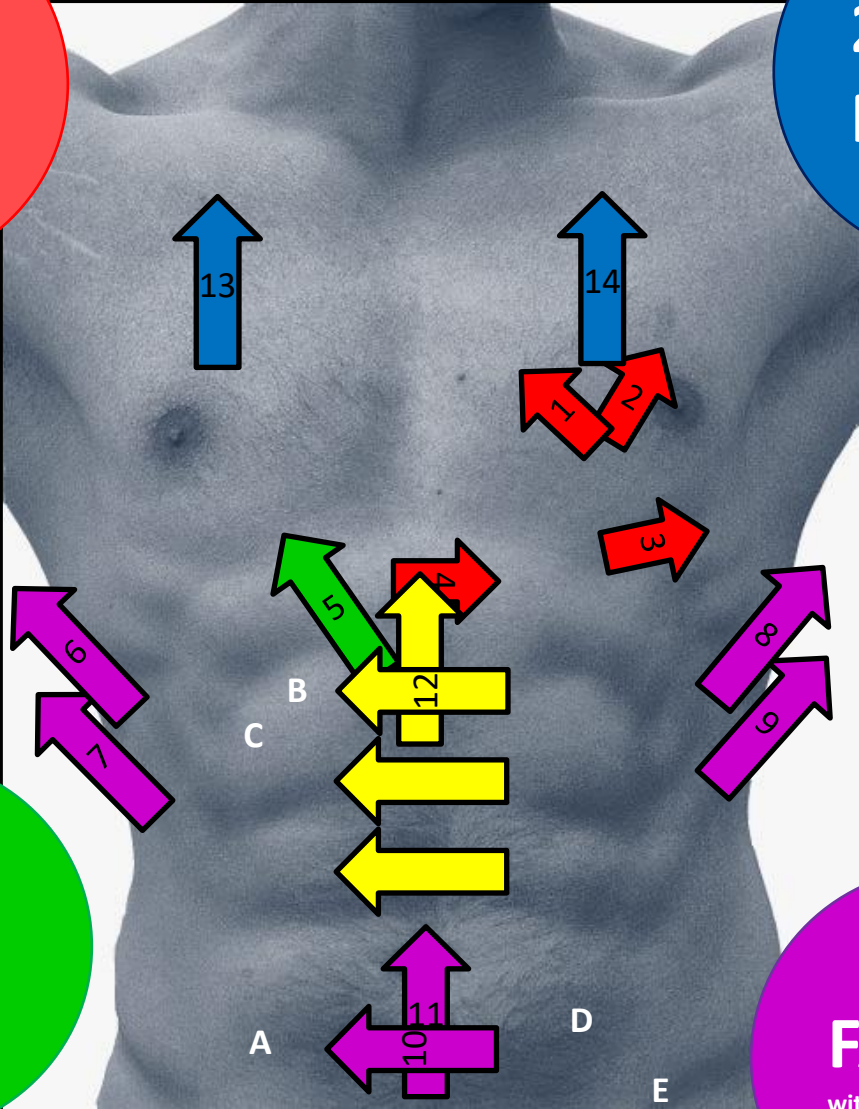

4  
Heart

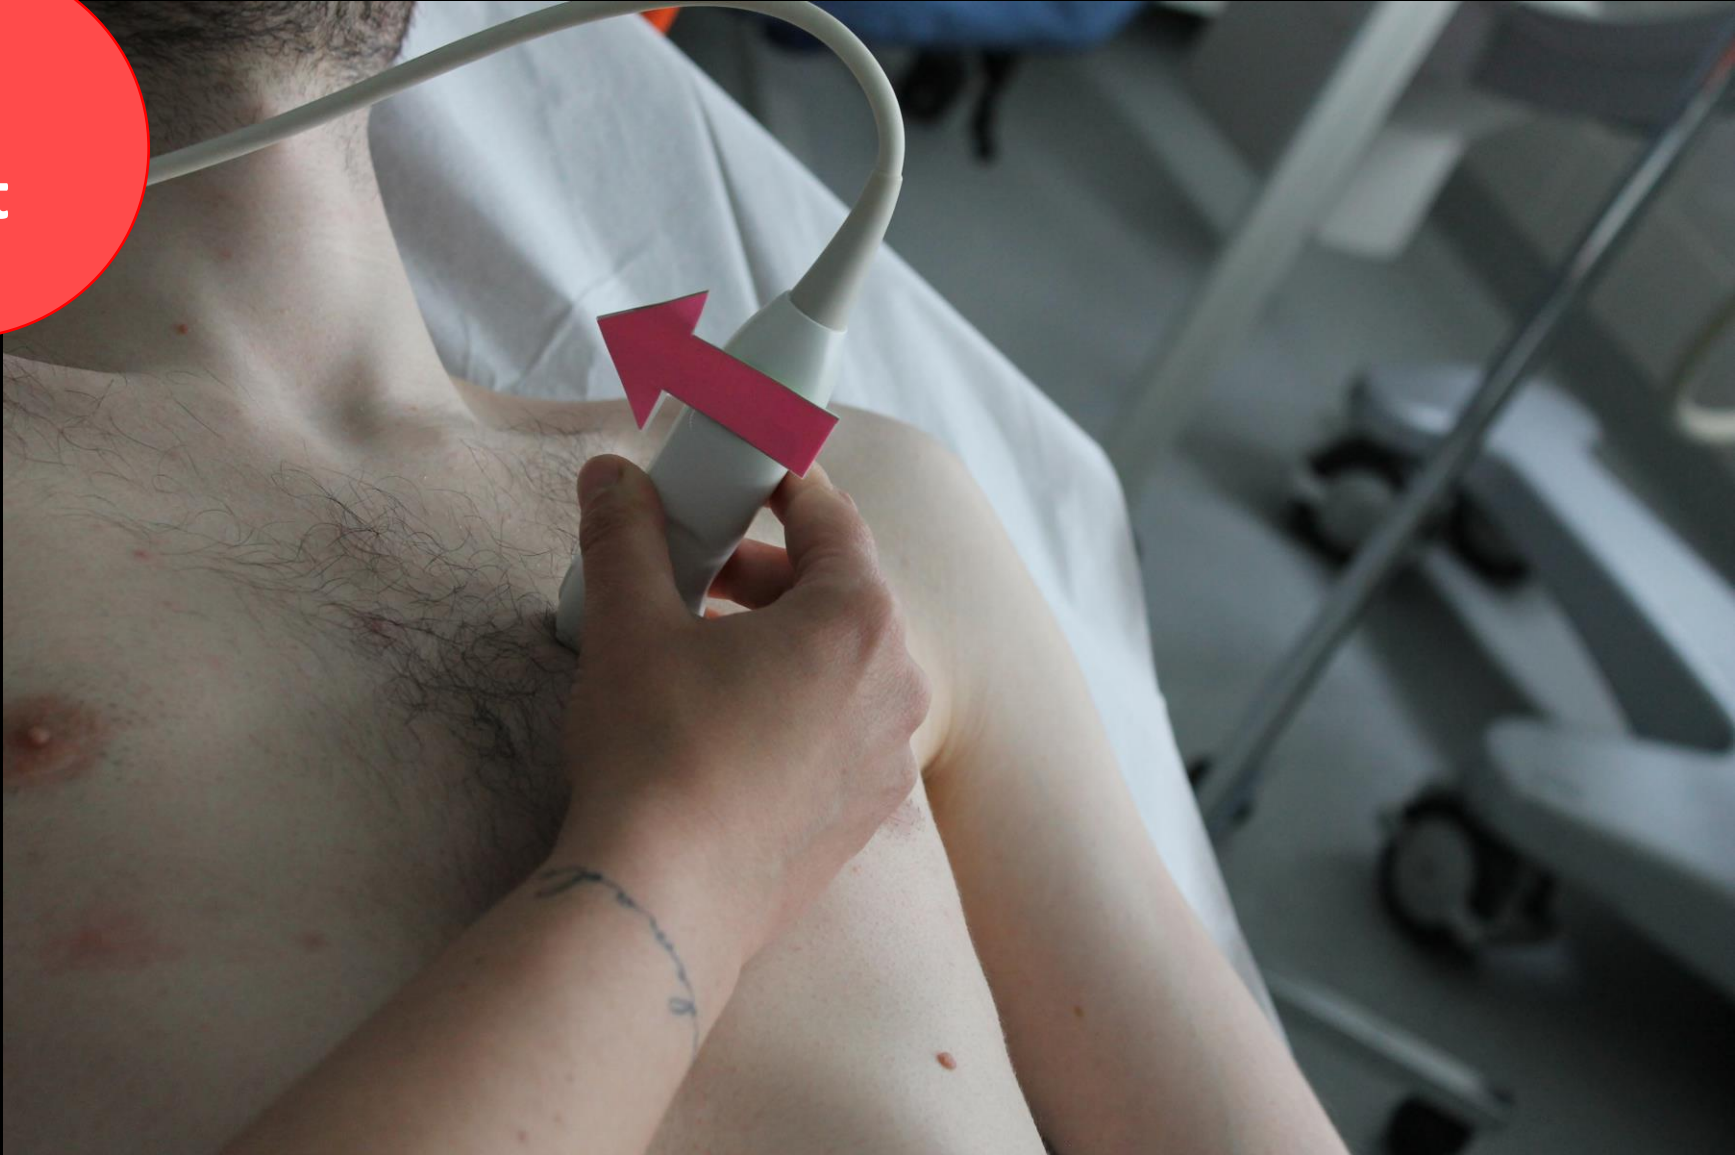

Parasternal lange Achse - PLAX

4

Heart

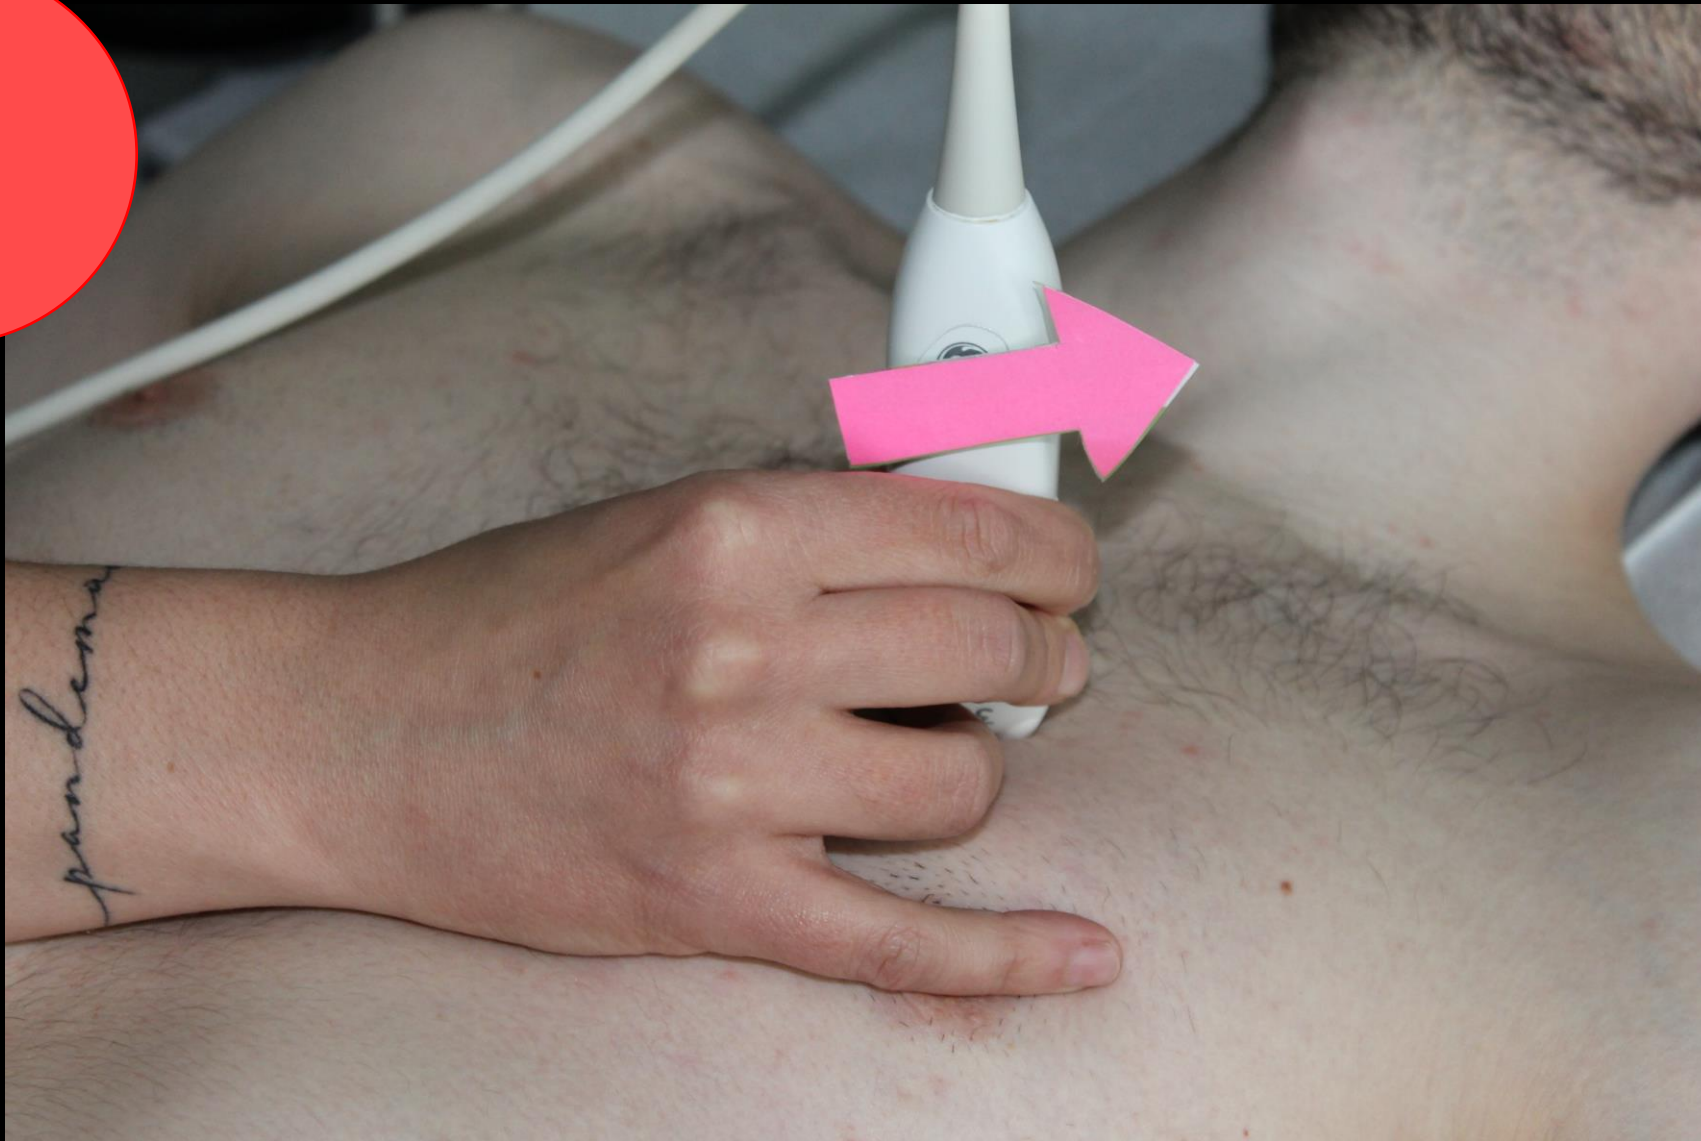

Parasternal kurze Achse - PSAX

4  
Heart

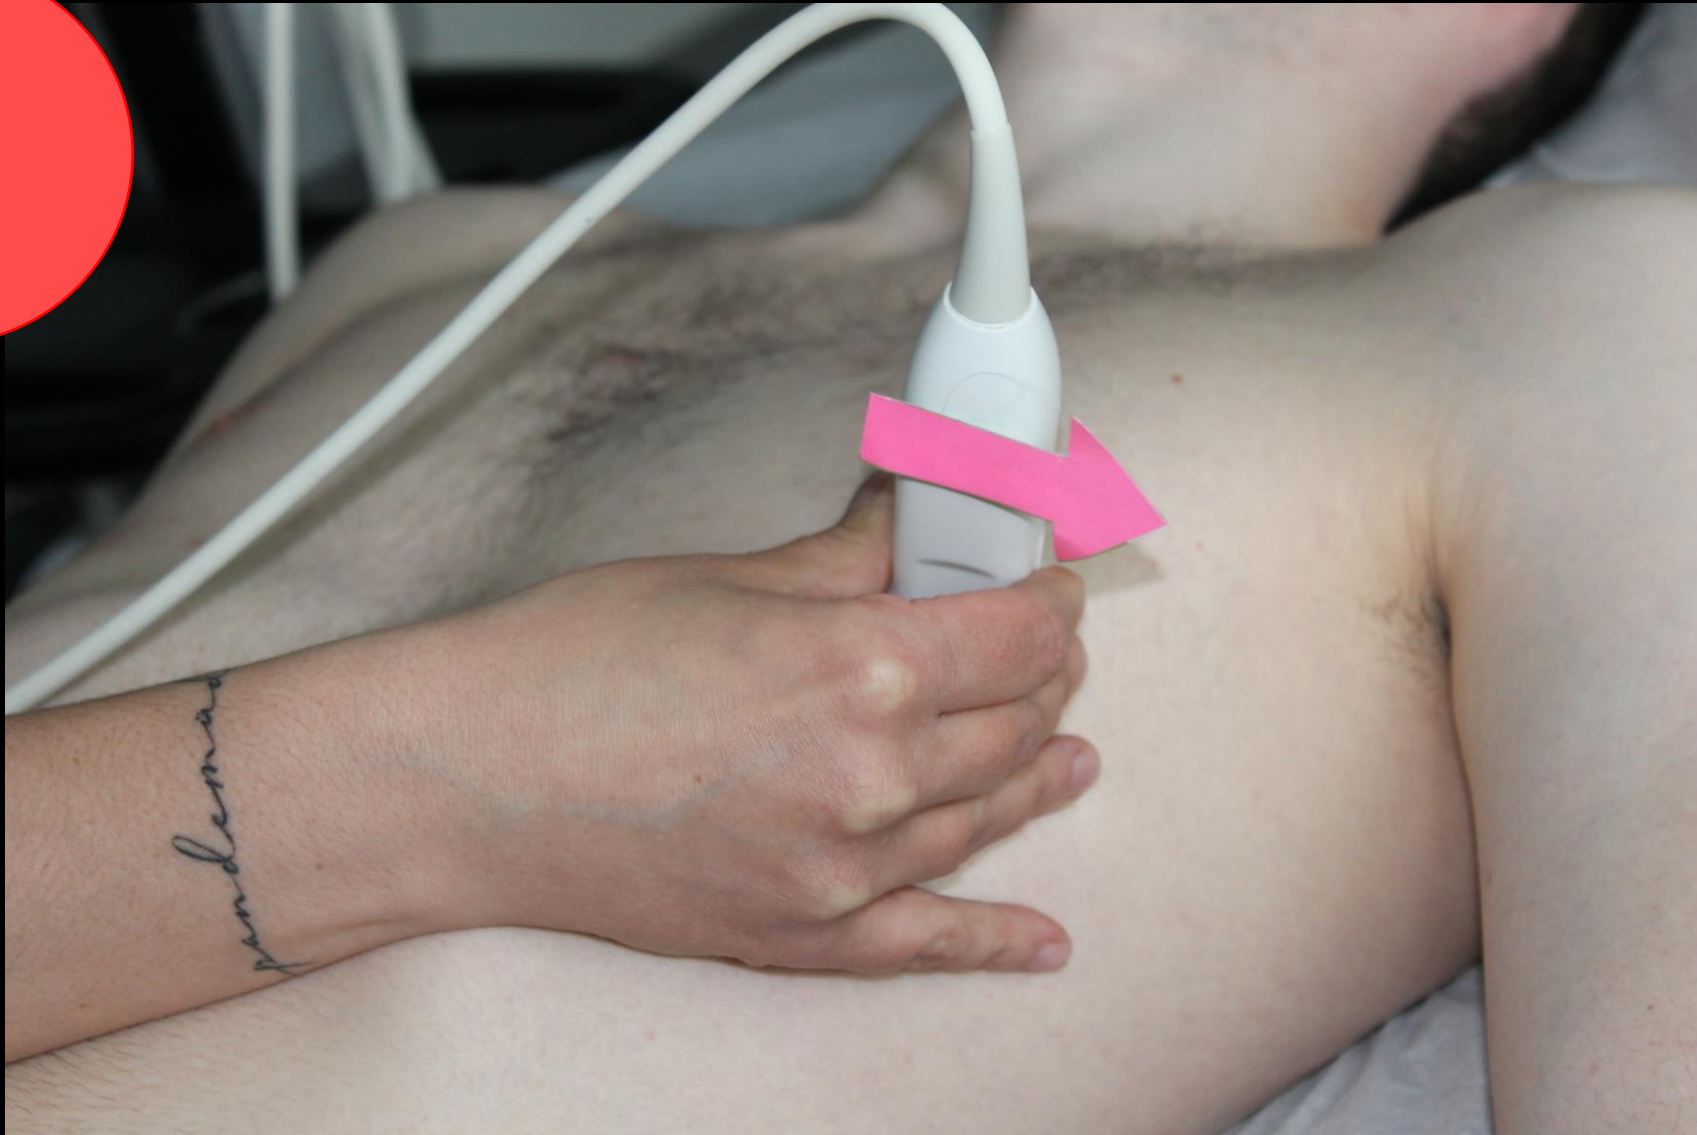

Apikaler 4-Kammerblick – A4CH

4  
Heart

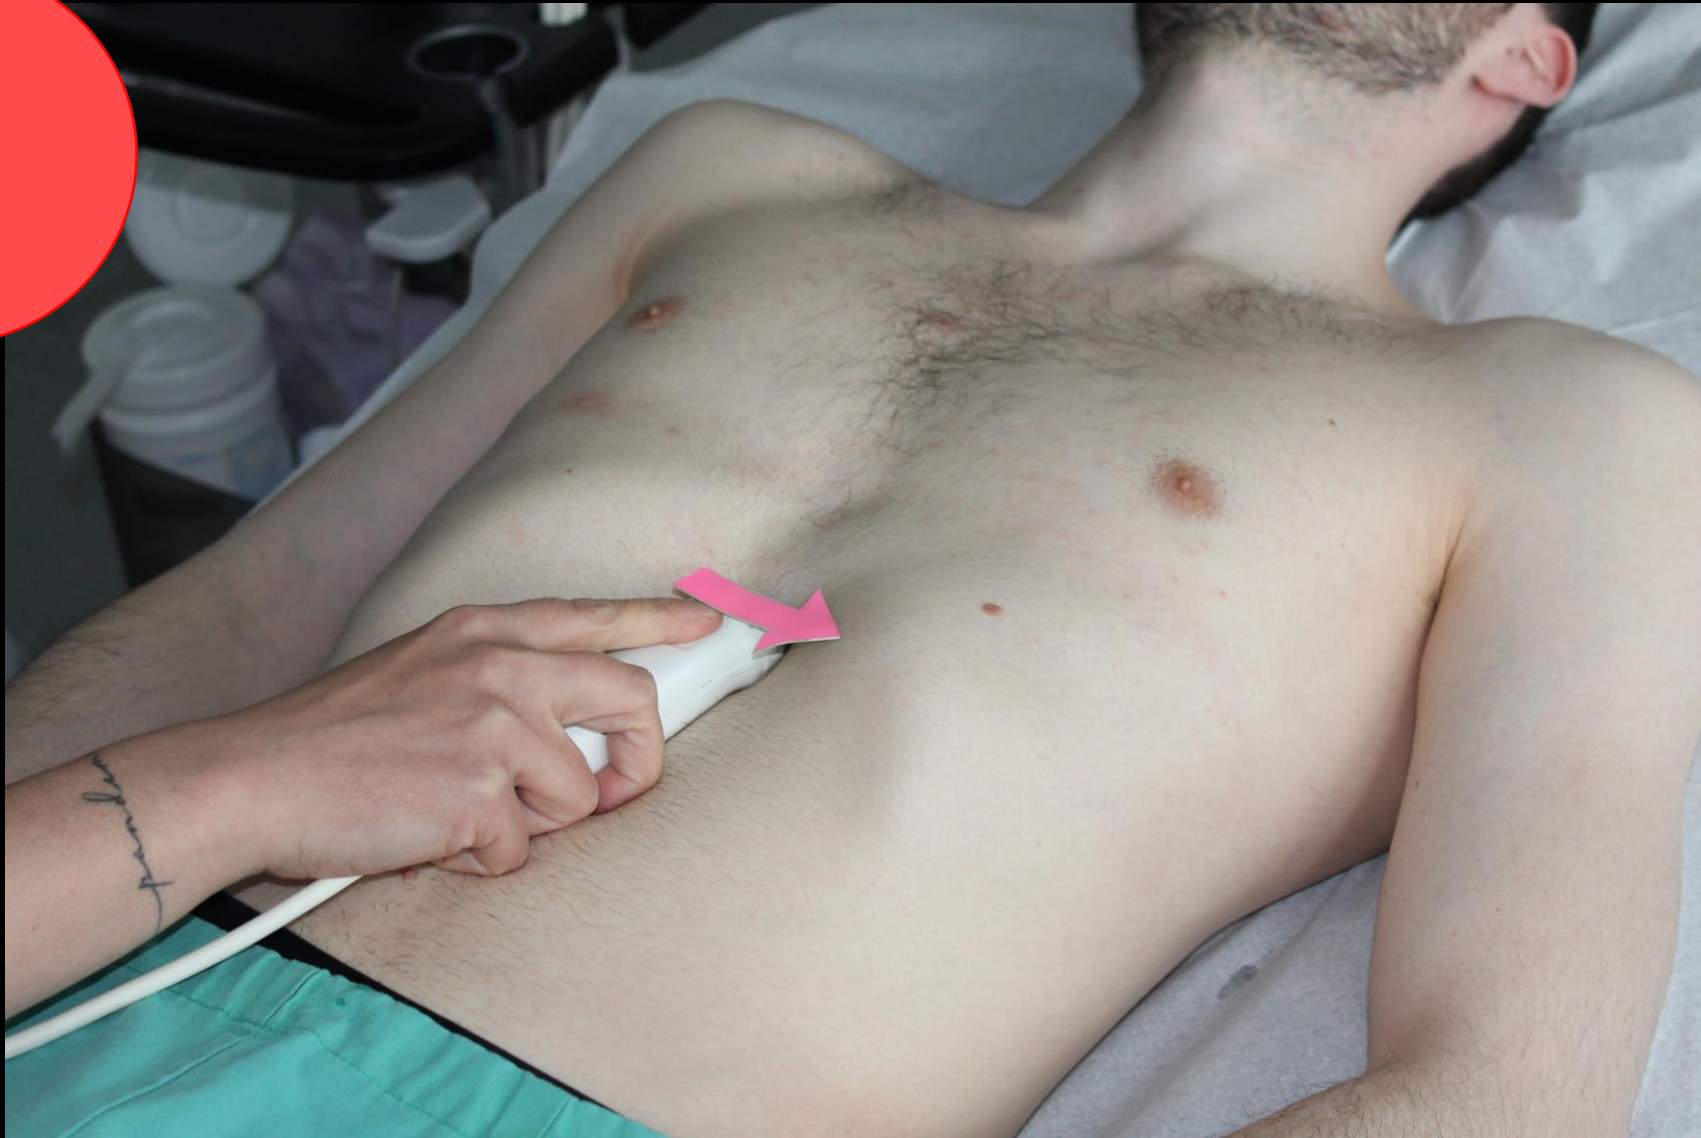

Subcostaler 4-Kammerblick – Sc4CH

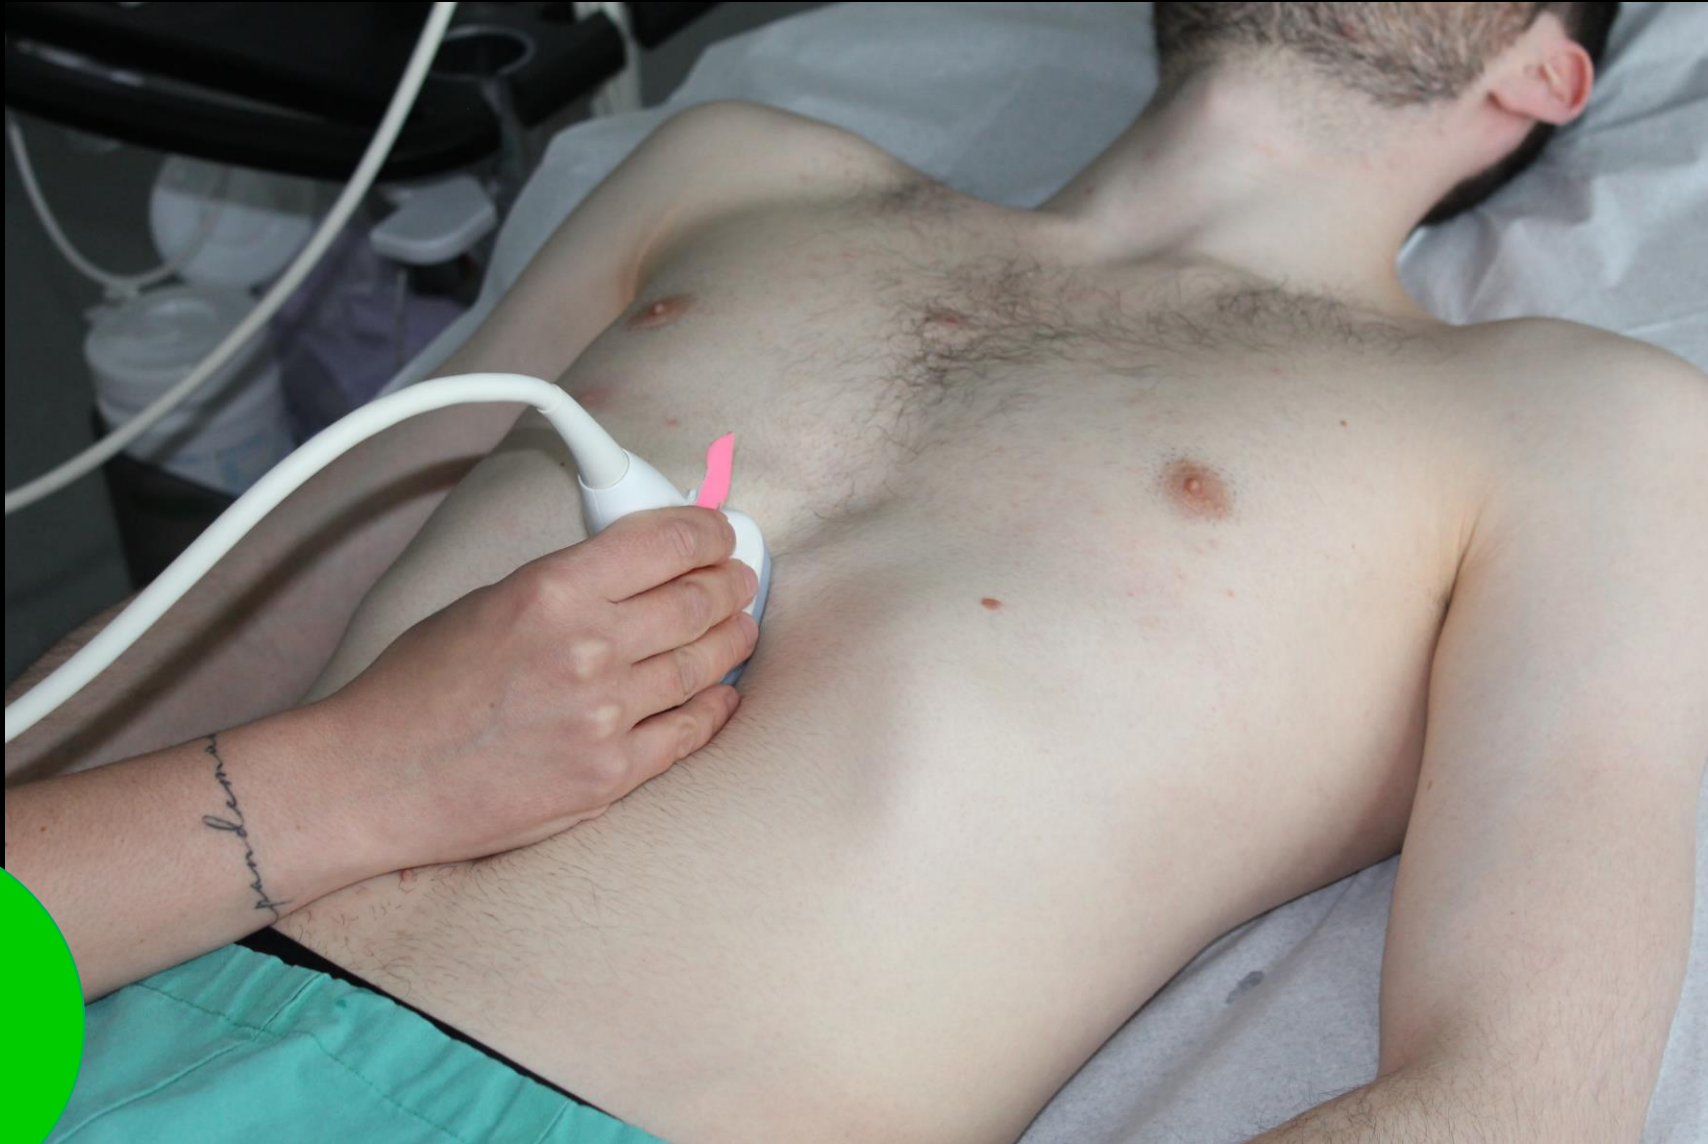

**I<sub>(vc)</sub> mix**

**Oberbauchlängsschnitt**

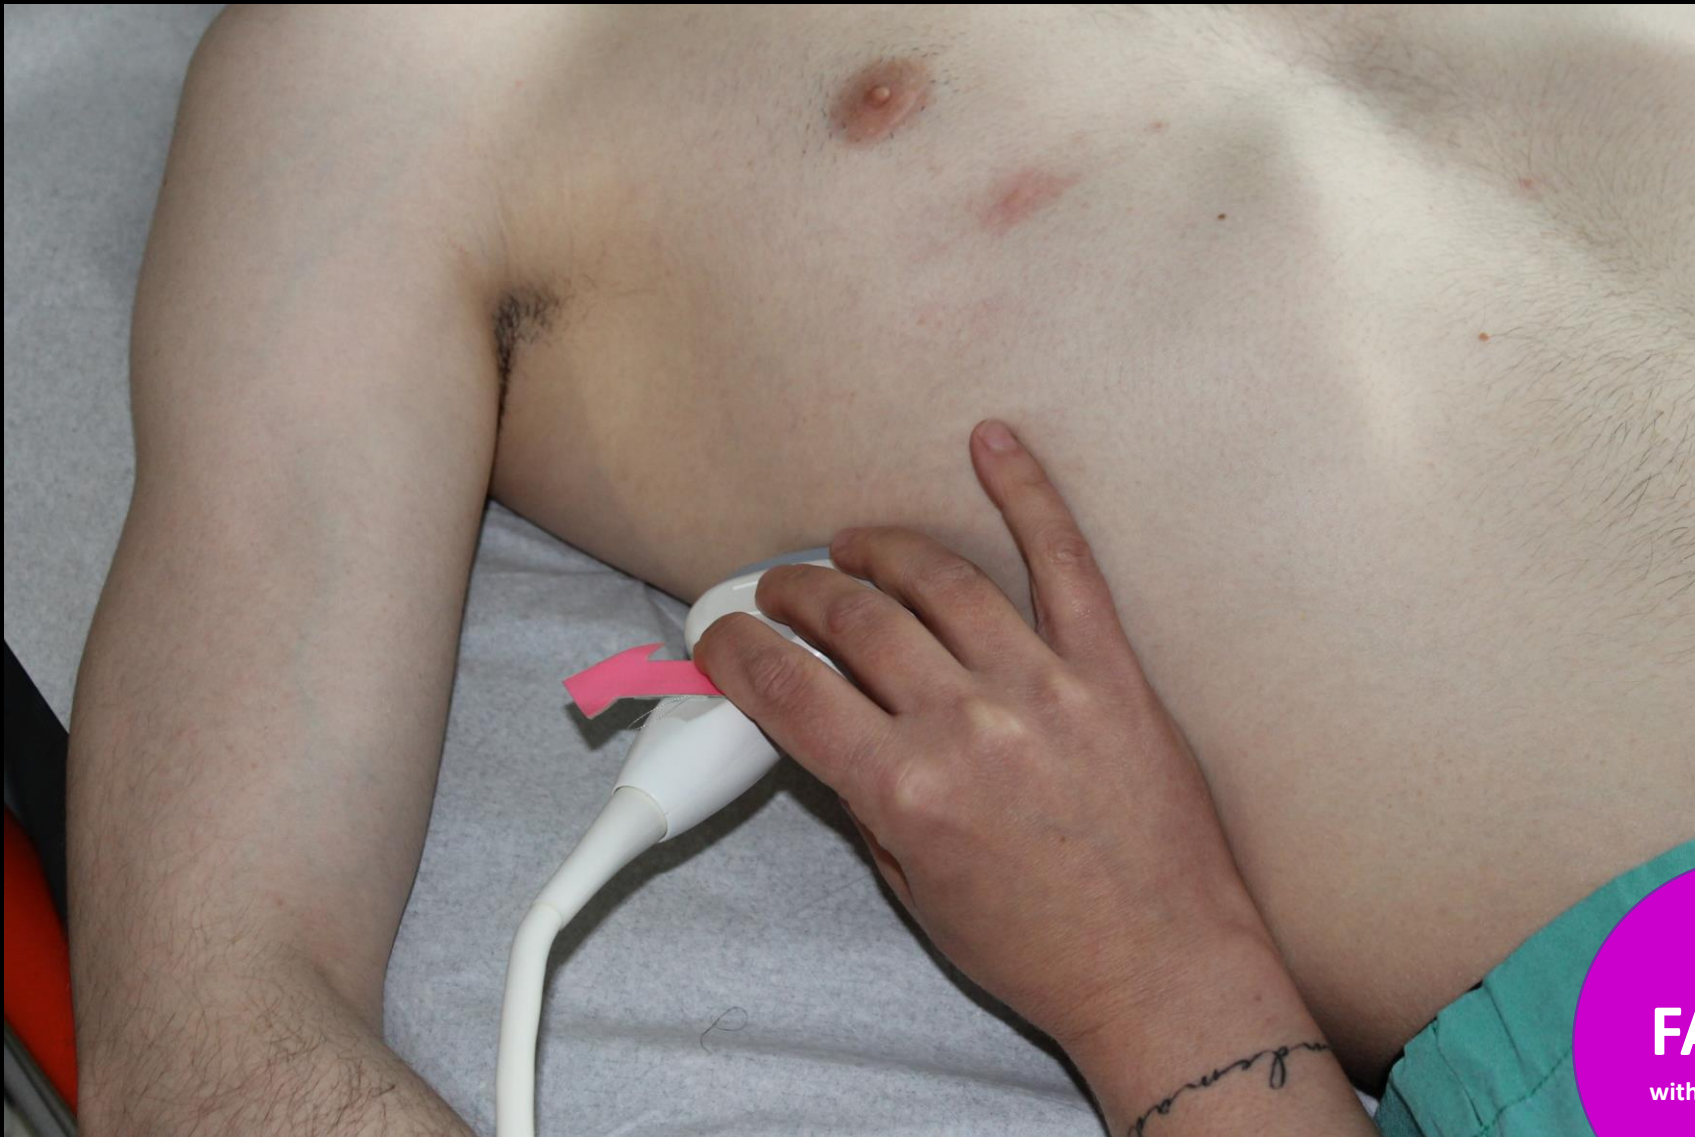

Rechter oberer Quadrant (ROQ)

**FAST 6**  
with

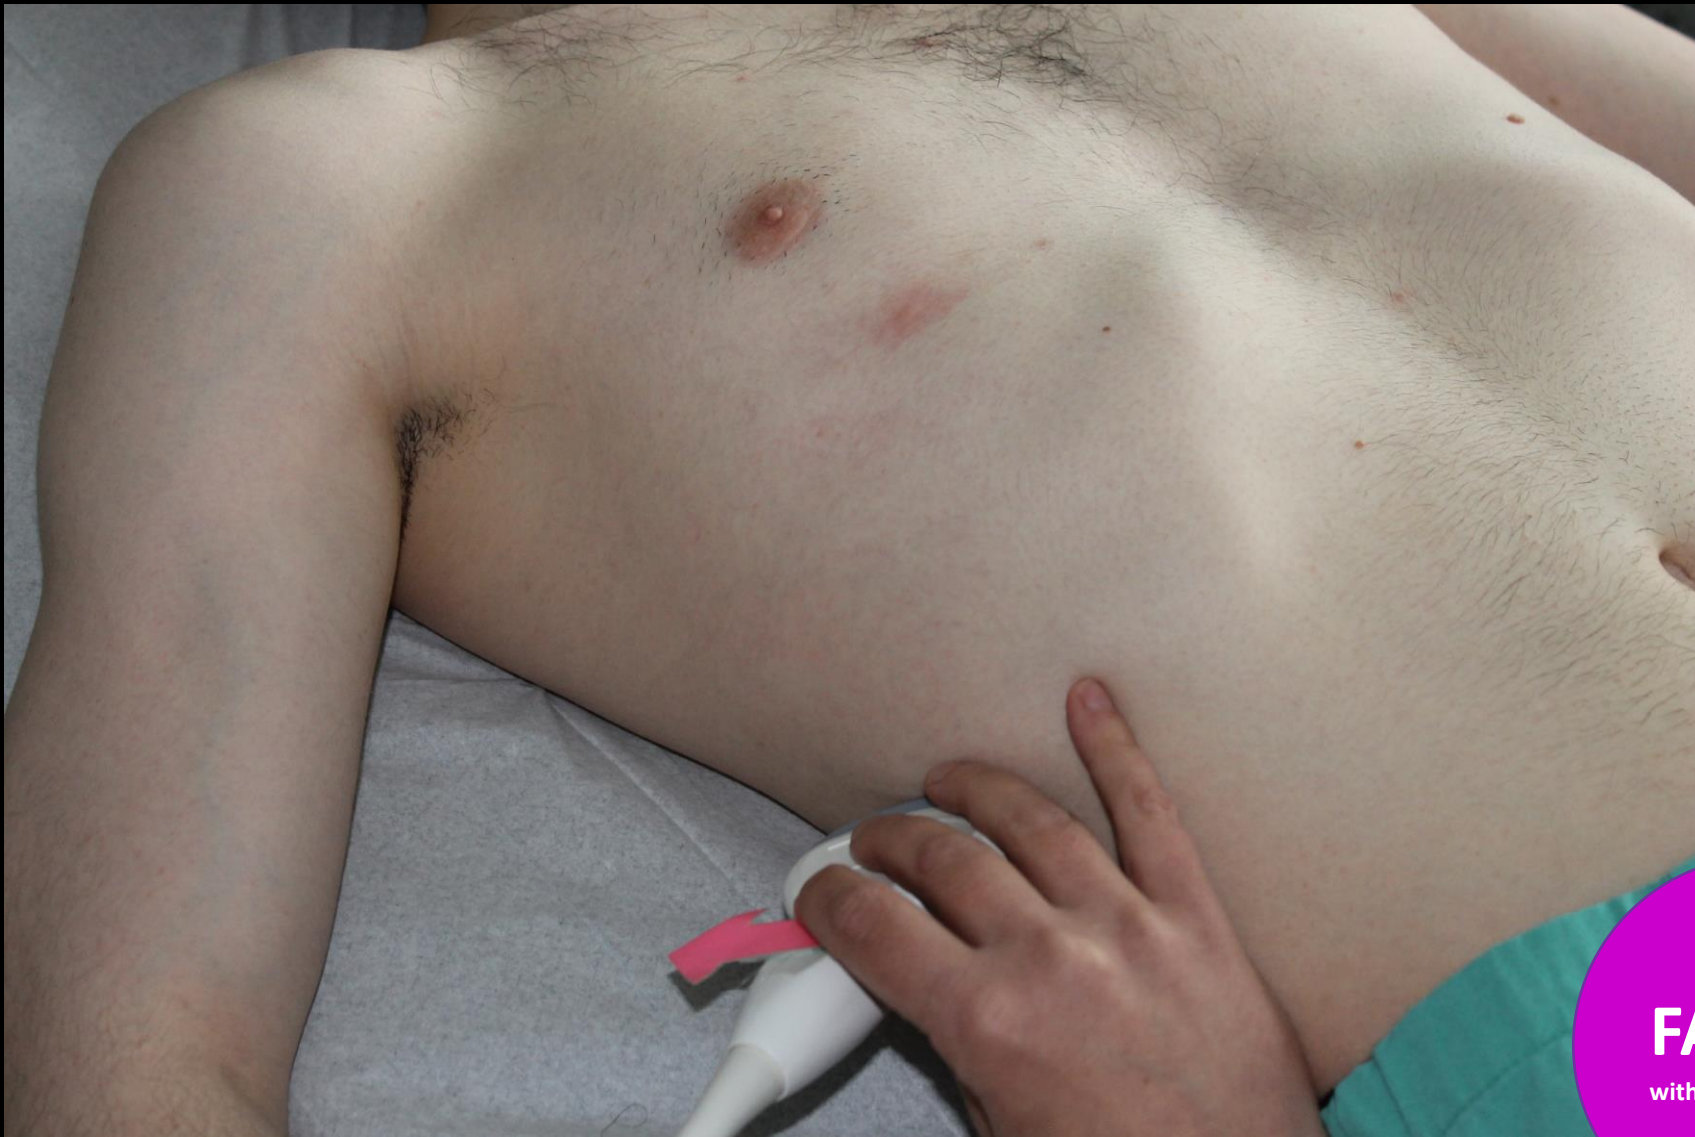

Rechter unterer Quadrant (RUQ)

**FAST 6**  
with

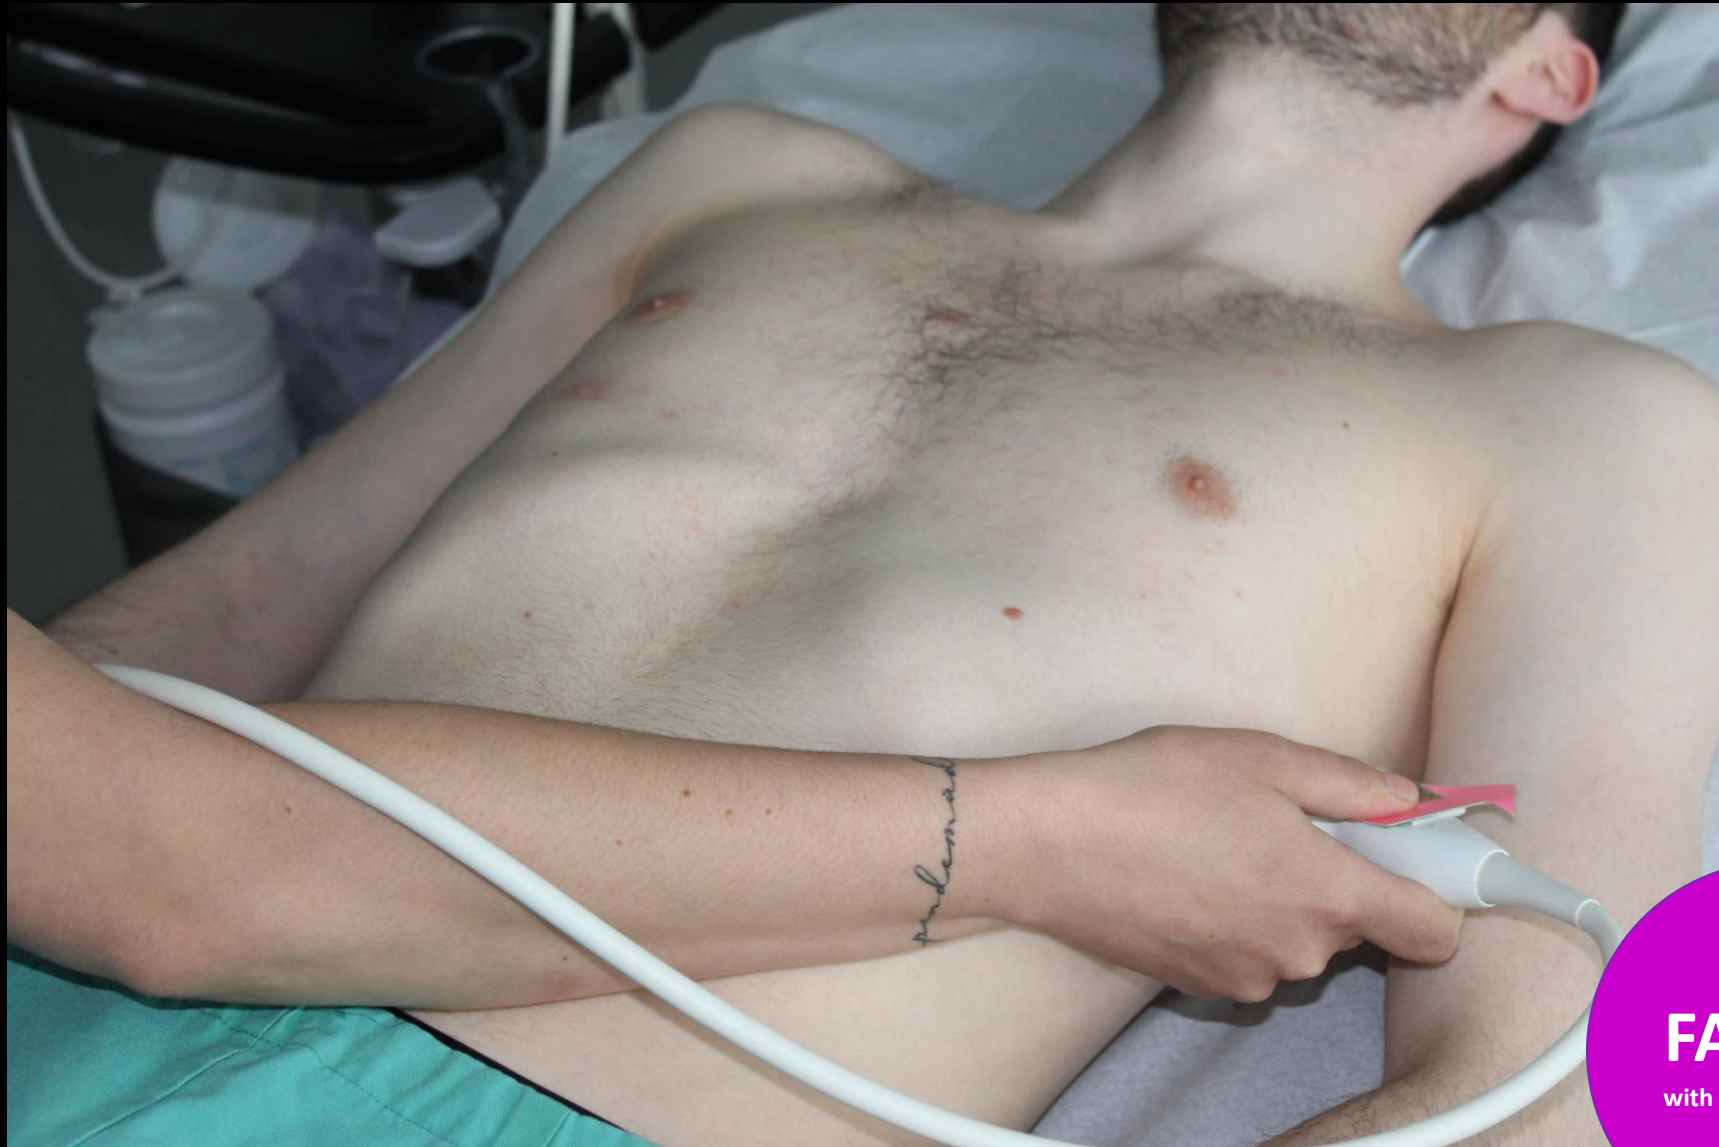

Linker oberer Quadrant (LOQ)

**FAST 6**

with

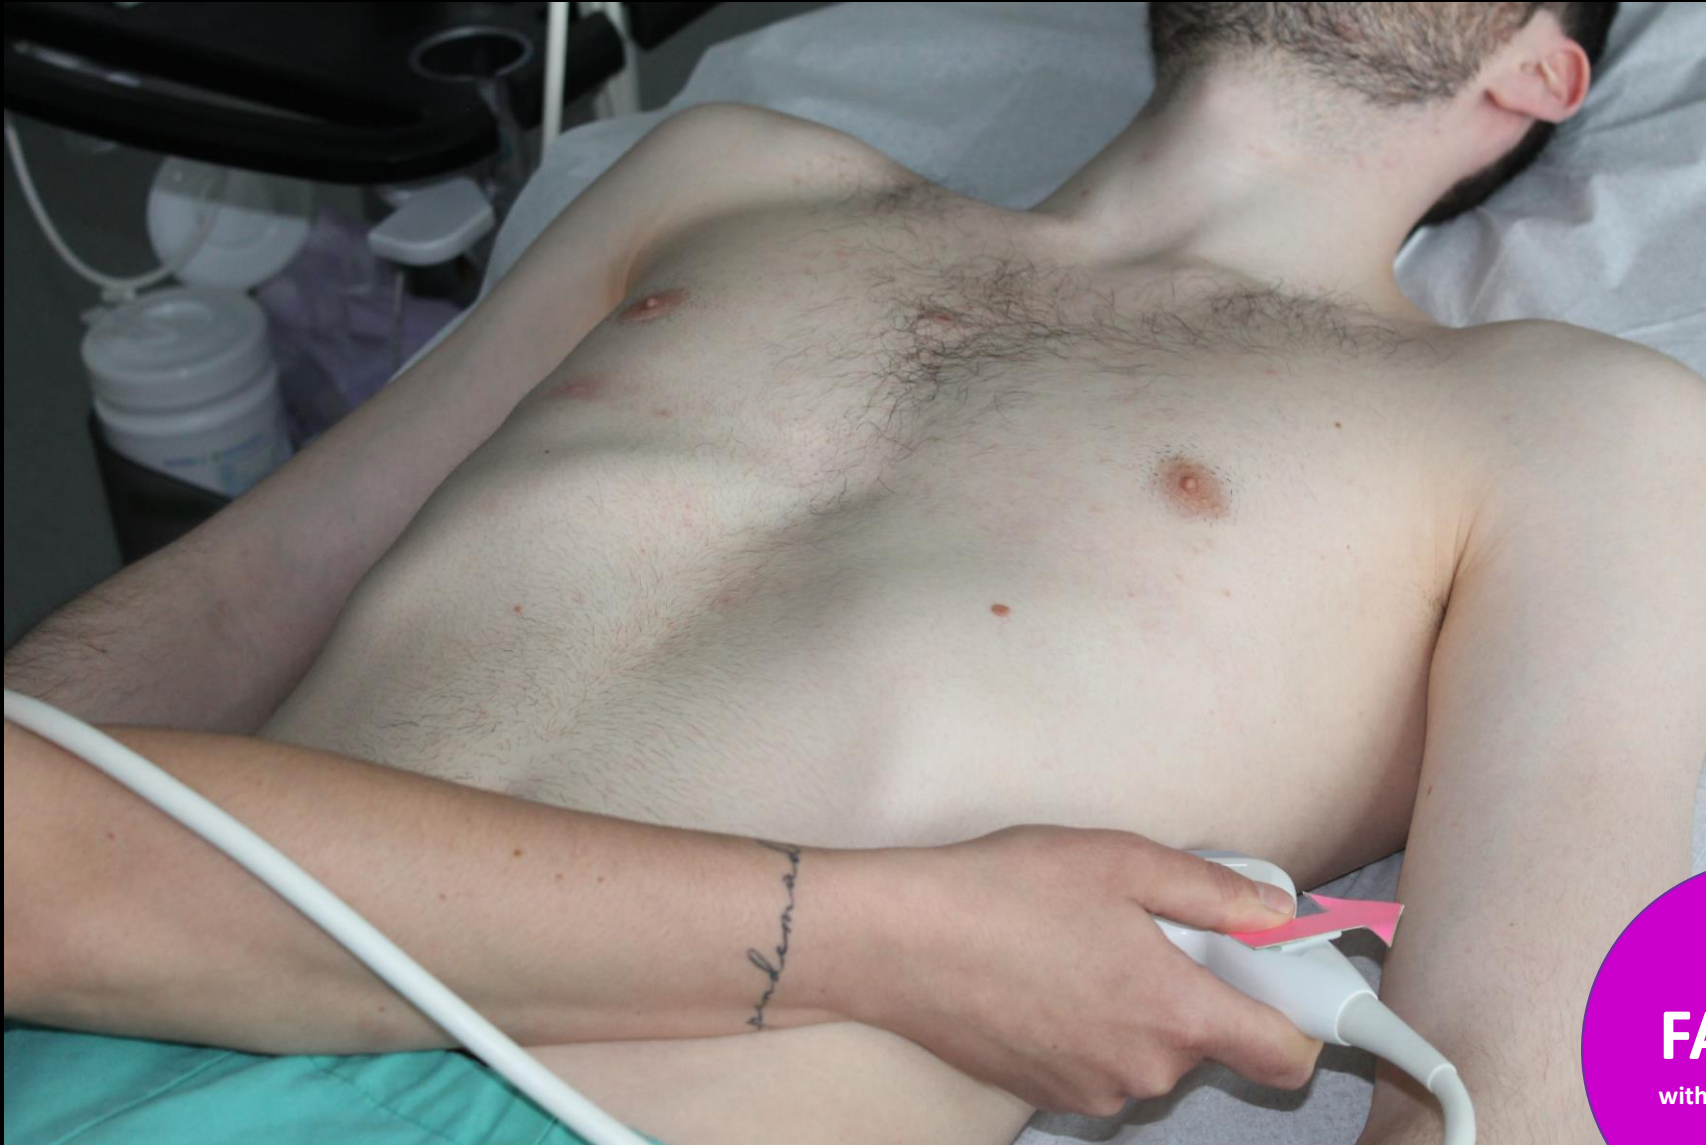

Linker unterer Quadrant (LUQ)

**FAST 6**  
with

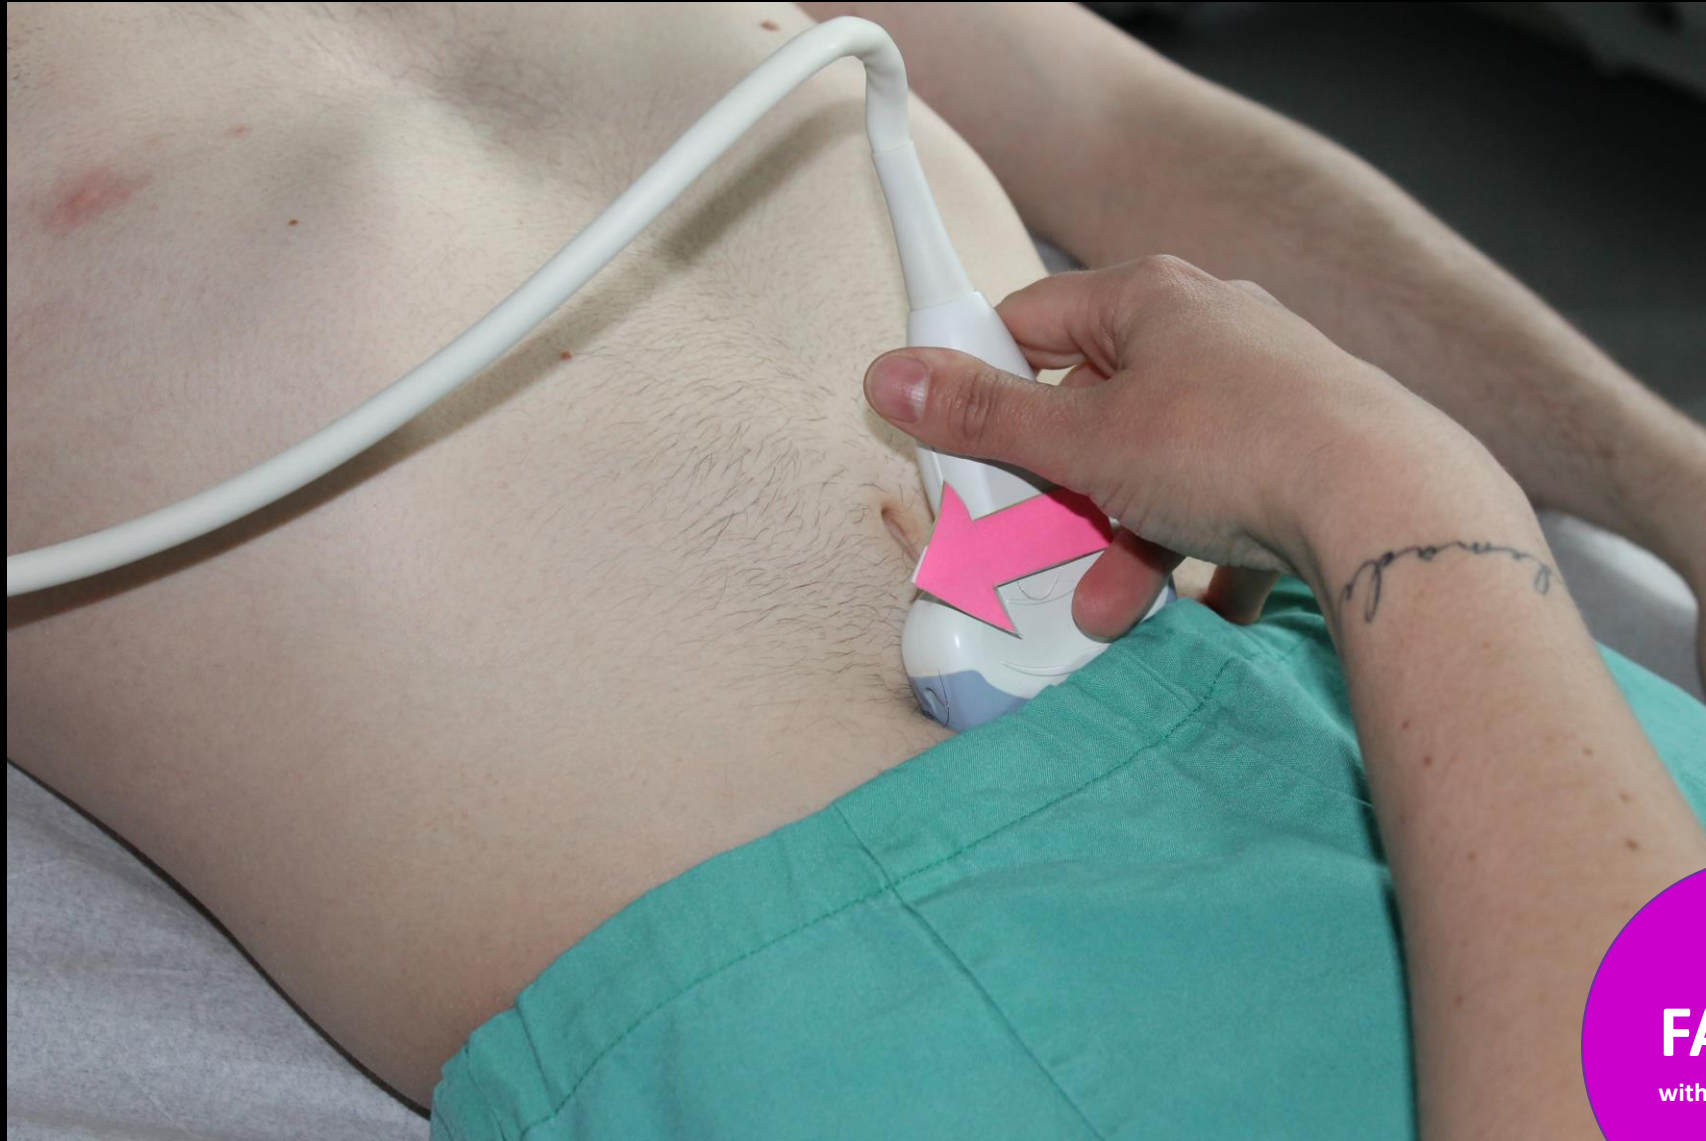

Suprapubischer Querschnitt

**FAST 6**  
with

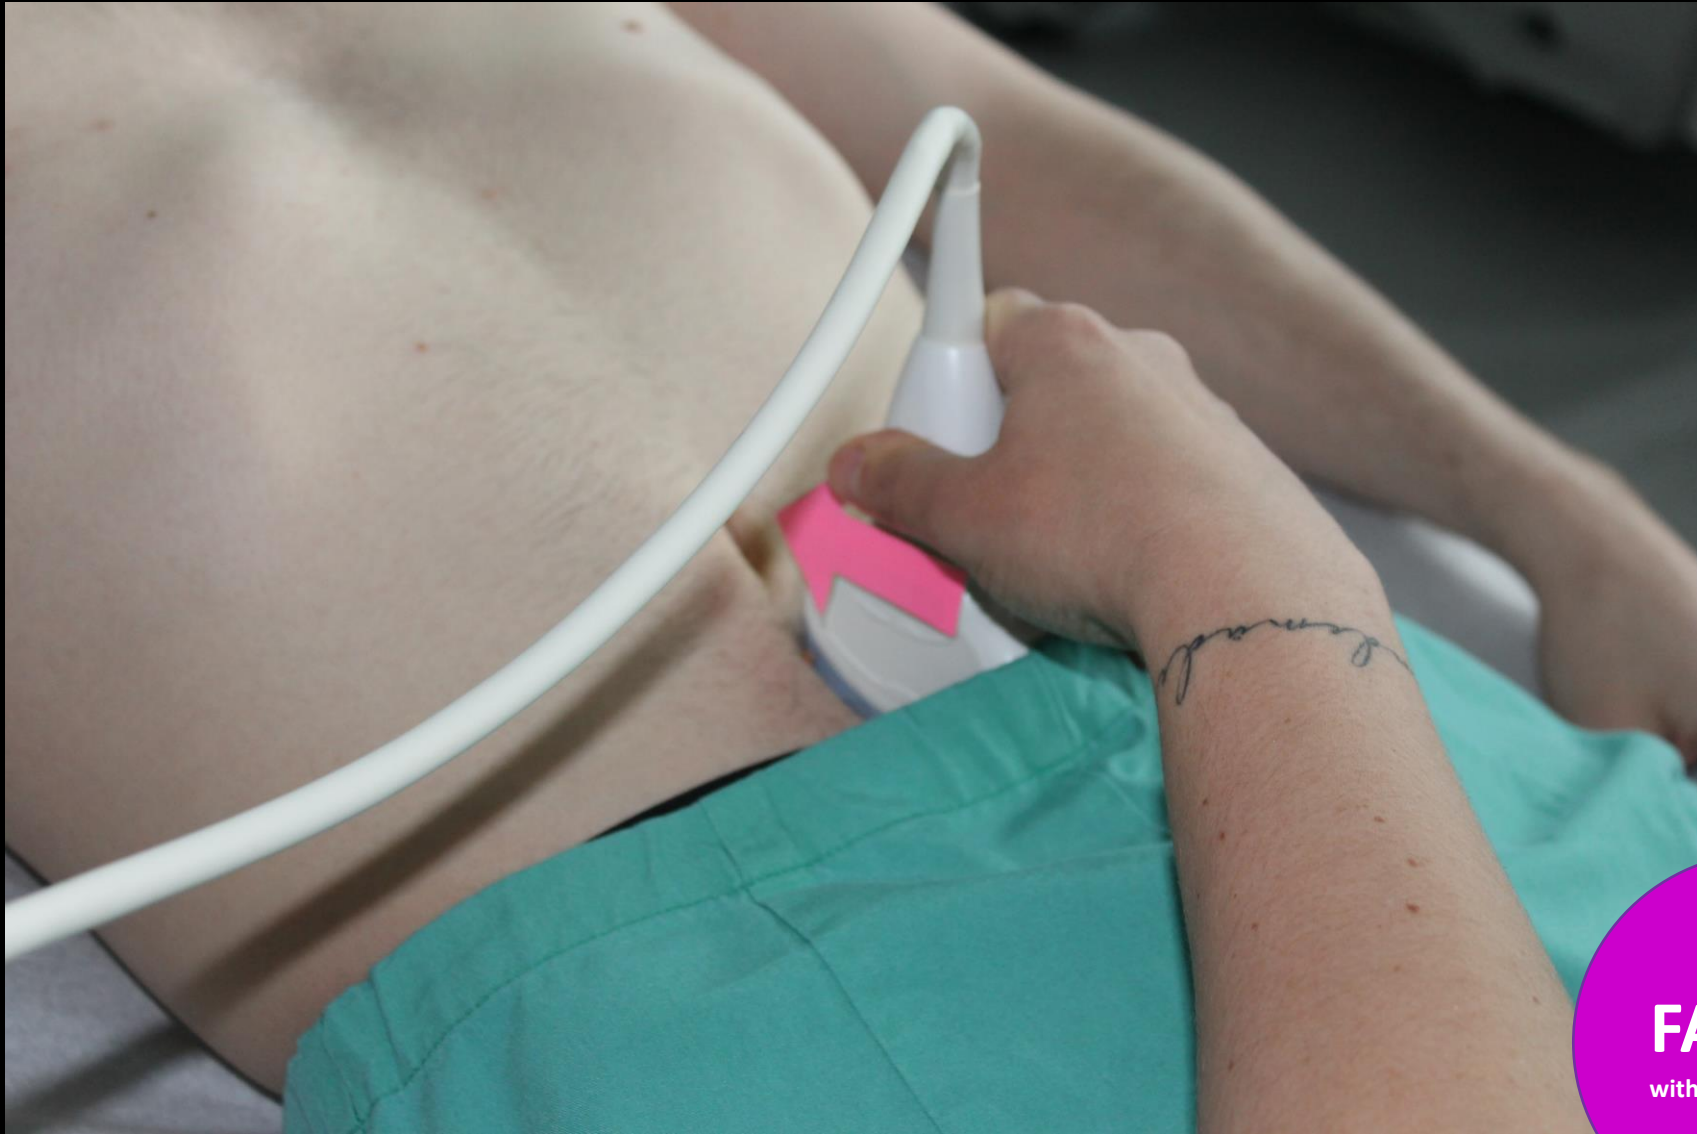

Suprapubischer Längsschnitt

**FAST 6**  
with

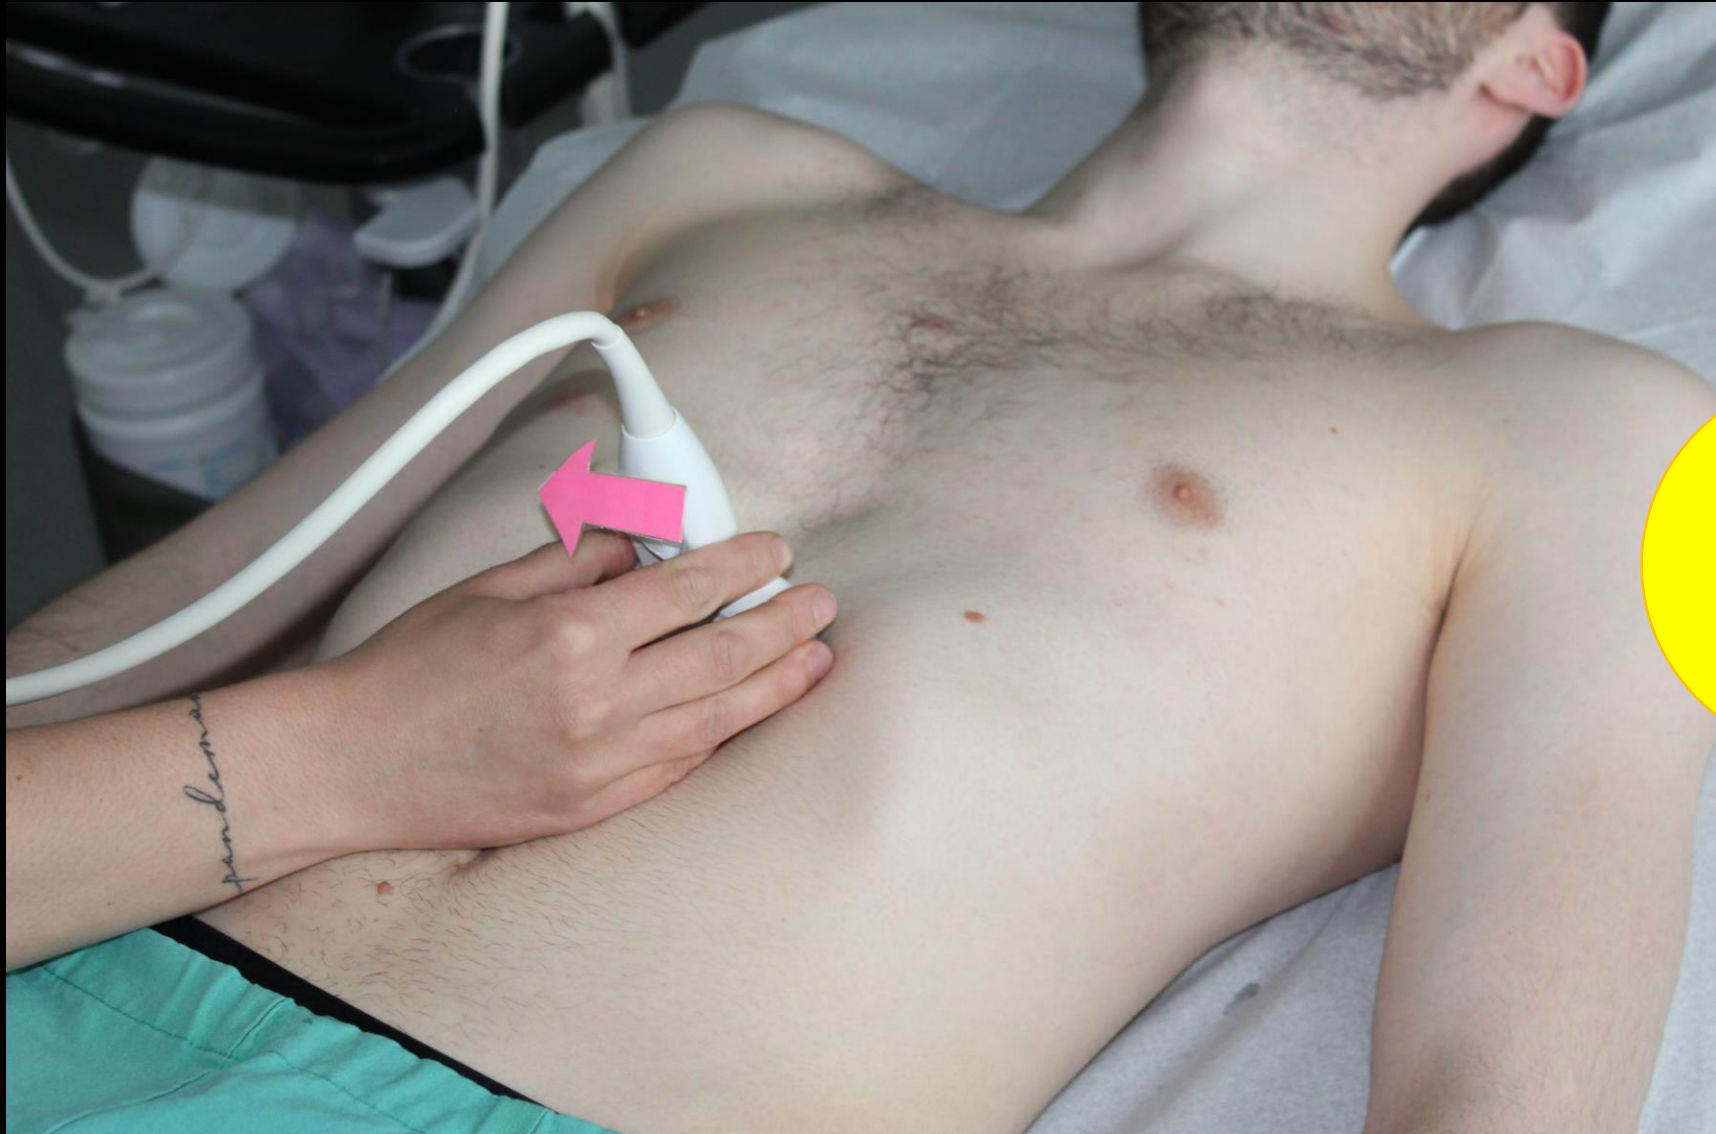

**Aorta**

**Oberbauch-Längsschnitt mit Drehung in Querachse und Gleiten nach kaudal**

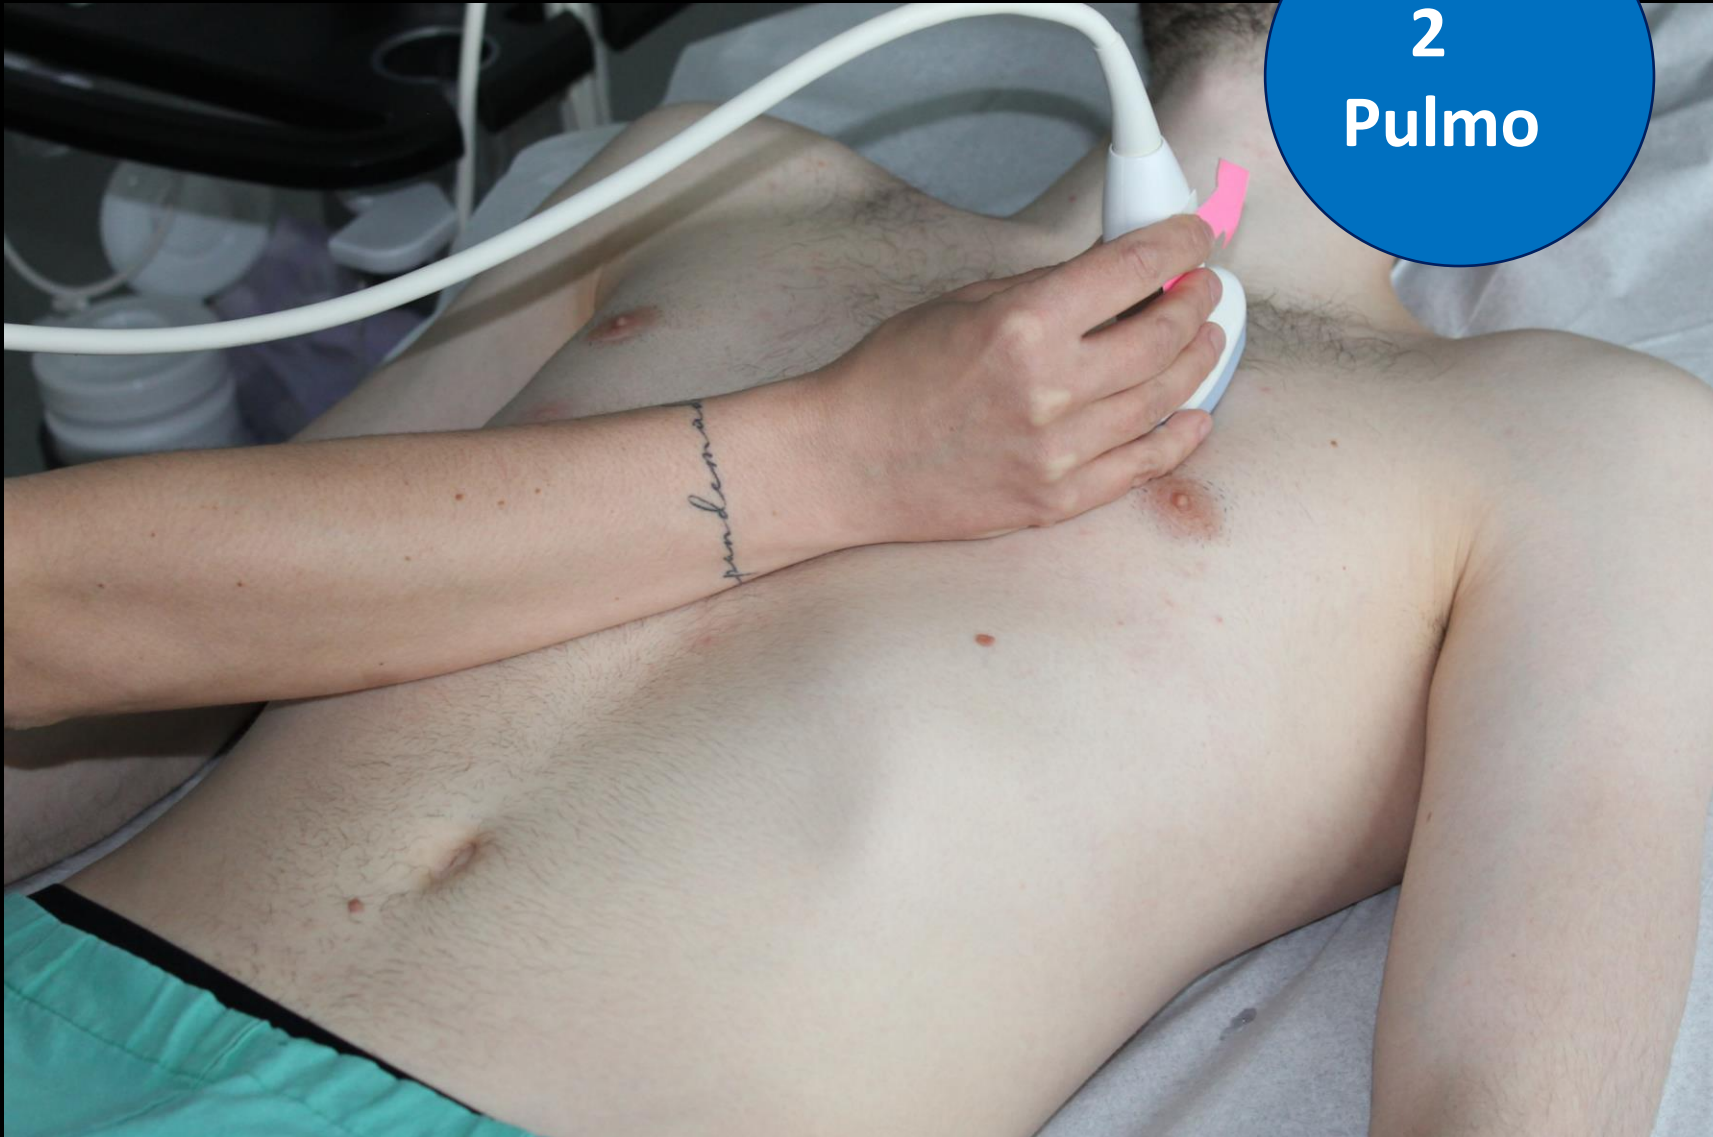

2  
Pulmo

Thorakaler Längsschnitt links

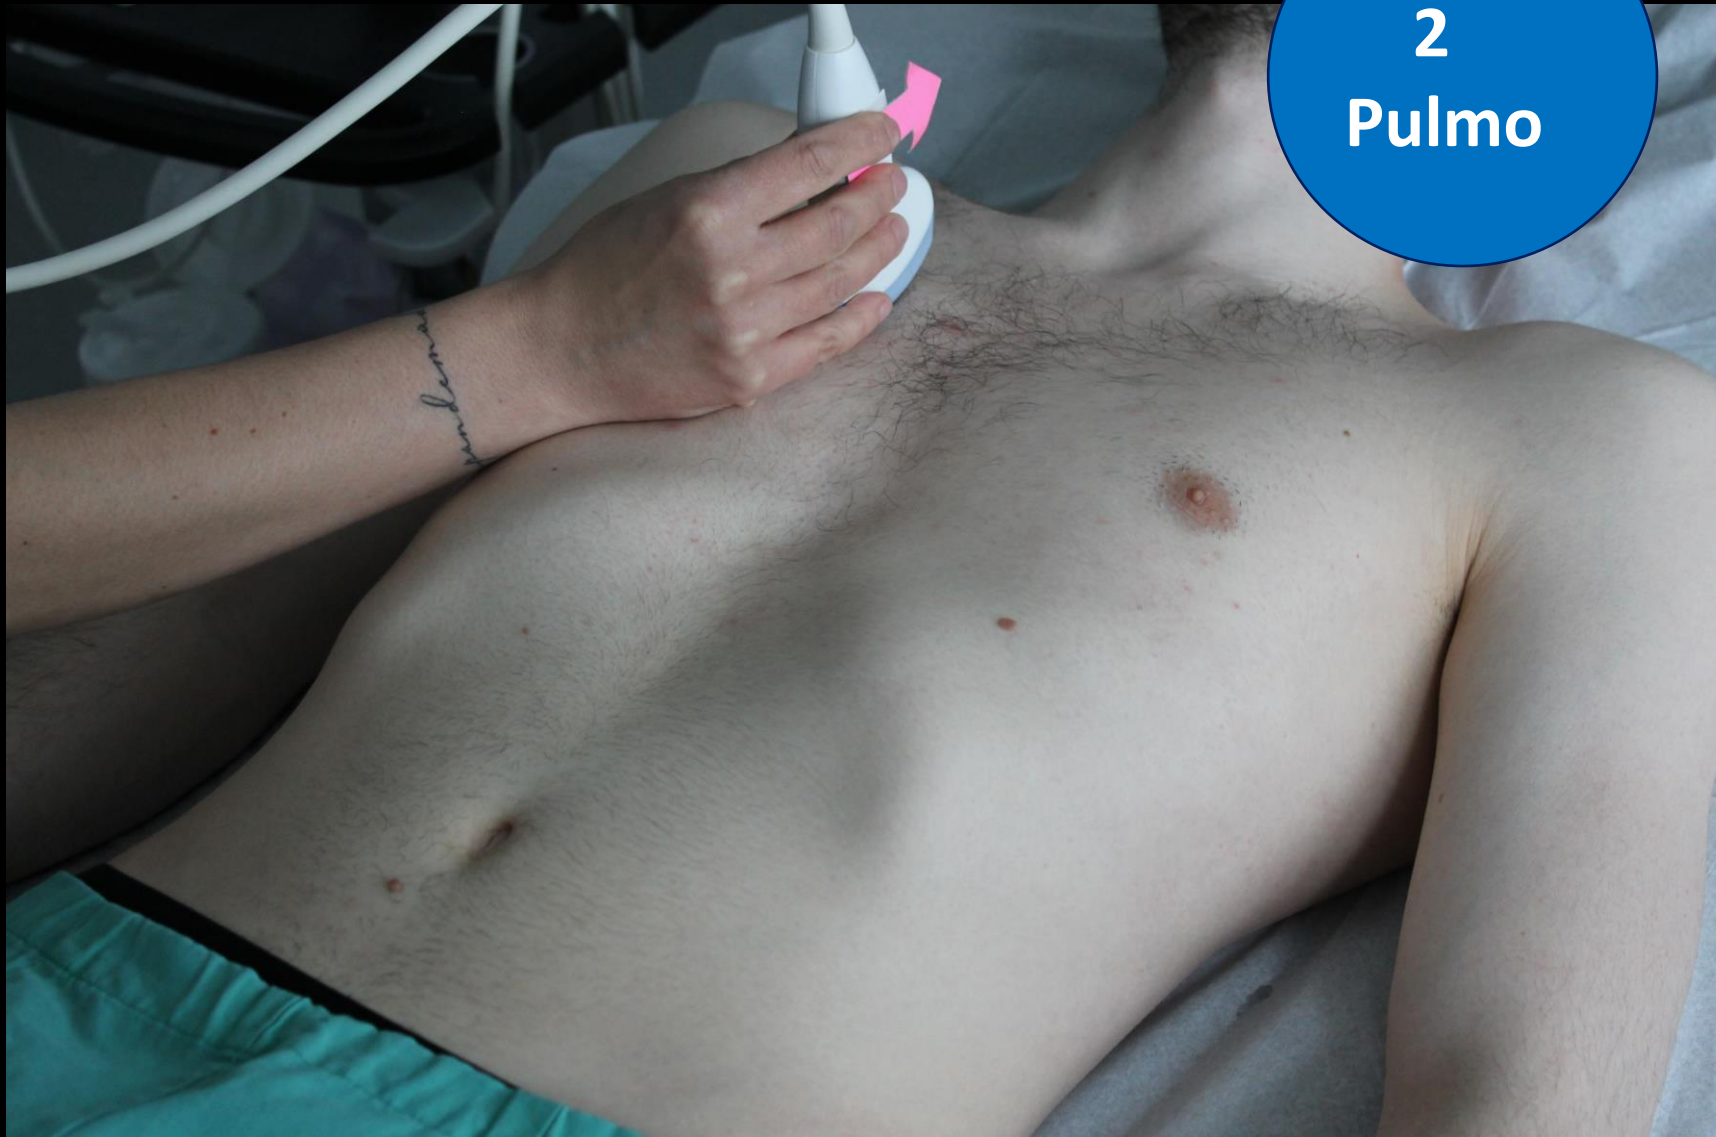

**Thorakaler Längsschnitt rechts**
